# Supplementary material for: Controlling the magnetic properties of dysprosium metallofullerene within metal–organic frameworks
Source: Royal Society of Chemistry journal article supplement (doi:10.1039/c6dt04180a), 2016-01-01
Supplement: c6dt04180a1.pdf [file c6dt04180a1.pdf]

Electronic Supplementary Information

## **Controlling the magnetic properties of dysprosium metallofullerene within metal-organic framework**

Yongjian Li,<sup>a,b</sup> Taishan Wang,<sup>\*a</sup> Haibing Meng,<sup>a,b</sup> Chong Zhao,<sup>a</sup> Mingzhe Nie,<sup>a,b</sup> Li Jiang,<sup>a</sup>  
Chunru Wang<sup>\*a</sup>

<sup>a</sup>Beijing National Laboratory for Molecular Sciences, Key Laboratory of Molecular Nanostructure and Nanotechnology, Institute of Chemistry, Chinese Academy of Science, Zhongguancun North First Street 2, 100190 Beijing, China

*E-mail: wangtais@iccas.ac.cn; crwang@iccas.ac.cn*

<sup>b</sup>University of Chinese Academy of Sciences, Beijing 100049, China

### **Table of contents**

#### **1. Synthesis and Characterization Methods**

##### **1-1. Synthesis of DySc<sub>2</sub>N@C<sub>80</sub>**

##### **1-2. Synthesis of C<sub>4</sub>H<sub>9</sub>N-DySc<sub>2</sub>N@C<sub>80</sub>**

##### **1-3. Synthesis of MOF-177**

##### **1-4. Preparation of DySc<sub>2</sub>N@C<sub>80</sub>@MOF-177 and C<sub>4</sub>H<sub>9</sub>N-DySc<sub>2</sub>N@C<sub>80</sub>@MOF-177**

##### **1-5. Characterizations methods of materials and magnetism**

#### **2. Characterization of DySc<sub>2</sub>N@C<sub>80</sub>@MOF-177 complex**

#### **3. Magnetisms of DySc<sub>2</sub>N@C<sub>80</sub>@MOF-177 complex with different loading amounts of DySc<sub>2</sub>N@C<sub>80</sub> in MOF-177**

#### **4. Supporting figures**

## 1. Synthesis and Characterization Methods

### 1-1. Synthesis of DySc<sub>2</sub>N@C<sub>80</sub>

DySc<sub>2</sub>N@C<sub>80</sub> was synthesized by arc-discharging method. Briefly, the mixture of graphite powder, Sc/Ni alloy and Dy(NO<sub>3</sub>)<sub>3</sub>•5H<sub>2</sub>O powder with a mass ratio of 1:3:6 was packed into core-filled graphite rods. Subsequently the rods were burnt in a Krätschmer–Huffman generator under an atmosphere of 6 Torr N<sub>2</sub> and 194 Torr He. The as-prepared soot was Soxlet-extracted with toluene for 12 h. DySc<sub>2</sub>N@C<sub>80</sub> was isolated and purified by multi-step high performance liquid chromatography (HPLC).

### 1-2. Synthesis of C<sub>4</sub>H<sub>9</sub>N-DySc<sub>2</sub>N@C<sub>80</sub>

DySc<sub>2</sub>N@C<sub>80</sub> in toluene solution was heated with N-ethylglycine and paraformaldehyde at 120 °C for 50 min to give corresponding fulleropyrrolidine with yield of nearly 70%. Pure C<sub>4</sub>H<sub>9</sub>N-DySc<sub>2</sub>N@C<sub>80</sub> was isolated by HPLC.

### 1-3. Synthesis of MOF-177

MOF-177 was prepared by the solvothermal method as previously reported.<sup>[1]</sup> Briefly, 60 mg of Zn(NO<sub>3</sub>)<sub>2</sub>•6H<sub>2</sub>O and 40 mg of H<sub>3</sub>BTB were dissolved in 10 ml of DEF, then the solution was sealed in a reaction vessel and heated at a rate of 2 °C/min to 85 °C and held for 48 h, and cooled at a rate of 2 °C/min to the room temperature. The as-synthesized crystals were rinsed three times with toluene.

### 1-4. Preparation of DySc<sub>2</sub>N@C<sub>80</sub>@MOF-177 and C<sub>4</sub>H<sub>9</sub>N-DySc<sub>2</sub>N@C<sub>80</sub>@MOF-177

About 10 mg of MOF-177 crystals were immersed in a solution 0.1 mg, 0.3 mg and 0.5 mg of DySc<sub>2</sub>N@C<sub>80</sub> in toluene for 7 days respectively until the color of the crystals changed to orange. The crystals with different contents of DySc<sub>2</sub>N@C<sub>80</sub> were washed with toluene (5 × 10 ml) and dried under N<sub>2</sub> flow. C<sub>4</sub>H<sub>9</sub>N-DySc<sub>2</sub>N@C<sub>80</sub>@MOF-177 with different contents of C<sub>4</sub>H<sub>9</sub>N-DySc<sub>2</sub>N@C<sub>80</sub> was prepared according to the same processes.

### 1-5. Characterizations methods of materials and magnetism

TEM images and element mapping analysis were characterized by a JEOL 1011 instrument. PXRD was performed on the Thermo Scientific ESCALab 250Xi using 200 W monochromated Al K $\alpha$  radiation. The content of DySc<sub>2</sub>N@C<sub>80</sub> in MOF-177 was calculated by inductively coupled plasma (ICP) results: ca. 5.2 mg of DySc<sub>2</sub>N@C<sub>80</sub>@MOF-177 crystals were dissolved in 5 ml of HNO<sub>3</sub>, sonicated for 30

min and then transferred to a mixture of H<sub>2</sub>SO<sub>4</sub>/H<sub>2</sub>O<sub>2</sub> (v/v = 4/1), sonicated for another 30 min. This acid solution was diluted 1000 times and detected the Dy<sup>3+</sup>, Sc<sup>3+</sup> and Zn<sup>2+</sup> on SHIMADZU ICPE-9000 instrument. The hysteresis loops of samples were collected on a Quantum Design MPMS XL-7 system at varied temperature within ±2 T at an average field sweep rate of 3.3 mT s<sup>-1</sup>. The susceptibility experiments were performed at temperature from 5 to 300 K in magnetic field of 0.1 T. The net mass of the samples is in the mg range. The samples were measured in a capsule with negligible magnetism.

## 2. Characterization of DySc<sub>2</sub>N@C<sub>80</sub>@MOF-177 complex

To verify the encapsulation of DySc<sub>2</sub>N@C<sub>80</sub> into the pores of MOF-177, Powder X-ray diffraction spectrum (PXRD), transmission electron microscopy (TEM), and Specific surface area measurement (BET) and energy dispersive spectrometer (EDS) were performed. It is obvious that the PXRD spectrum of DySc<sub>2</sub>N@C<sub>80</sub>@MOF-177 complex is different from that of pristine MOF-177 (Figure S4a). The new peaks appearing at 2-theta value of around 6° correspond to the *d* value of about 15 Å, which is ascribed to the crystal lattice perturbation caused by DySc<sub>2</sub>N@C<sub>80</sub> incarceration. Furthermore, the DySc<sub>2</sub>N@C<sub>80</sub>@MOF-177 complex crystal was cut off along cross section and EDS analysis was conducted (Figure S4b-S4f). It can be clearly seen that the dysprosium and scandium elements are uniformly distributed as well as carbon and zinc elements in DySc<sub>2</sub>N@C<sub>80</sub>@MOF-177 complex. BET surface area shows a decrease from 3672 m<sup>2</sup> g<sup>-1</sup> in MOF-177 crystal to 1246 m<sup>2</sup> g<sup>-1</sup> in DySc<sub>2</sub>N@C<sub>80</sub>@MOF-177 complex, indicating that the DySc<sub>2</sub>N@C<sub>80</sub> molecules have entered into the pores of MOF-177 rather than adsorbed on the crystal surface.

## 3. Magnetisms of DySc<sub>2</sub>N@C<sub>80</sub>@MOF-177 complex with different loading amounts

### of DySc<sub>2</sub>N@C<sub>80</sub> in MOF-177

Without DySc<sub>2</sub>N@C<sub>80</sub>, the MOF-177 exhibits a diamagnetic character. For 1%, 3% and 5% loading amounts of DySc<sub>2</sub>N@C<sub>80</sub> in MOF-177, their similar hysteresis loops can be observed clearly on M-H curves at 5 K (see Figure S5). These results showed that the magnetization relaxation of DySc<sub>2</sub>N@C<sub>80</sub> is the single-molecular property rather than the result from intermolecular interactions. The loading amount of 5% was selected to employ further investigation due to its better signal to noise ratio.

#### 4. Supporting figures

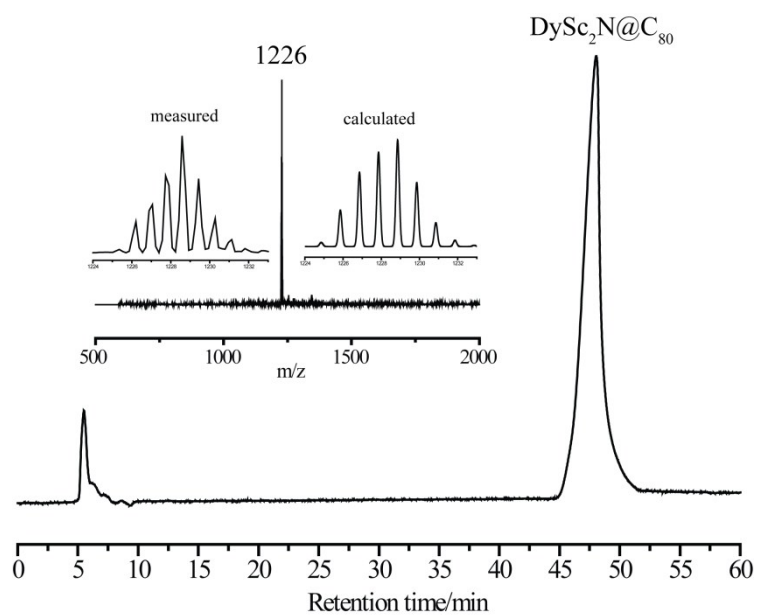

**Fig S1.** Chromatogram of the isolated DySc<sub>2</sub>N@C<sub>80</sub>. 20×250 mm Buckyprep column, flow rate 12 mL/min and toluene as eluent. The inset shows the MALDI-TOF-MS profile of DySc<sub>2</sub>N@C<sub>80</sub>.

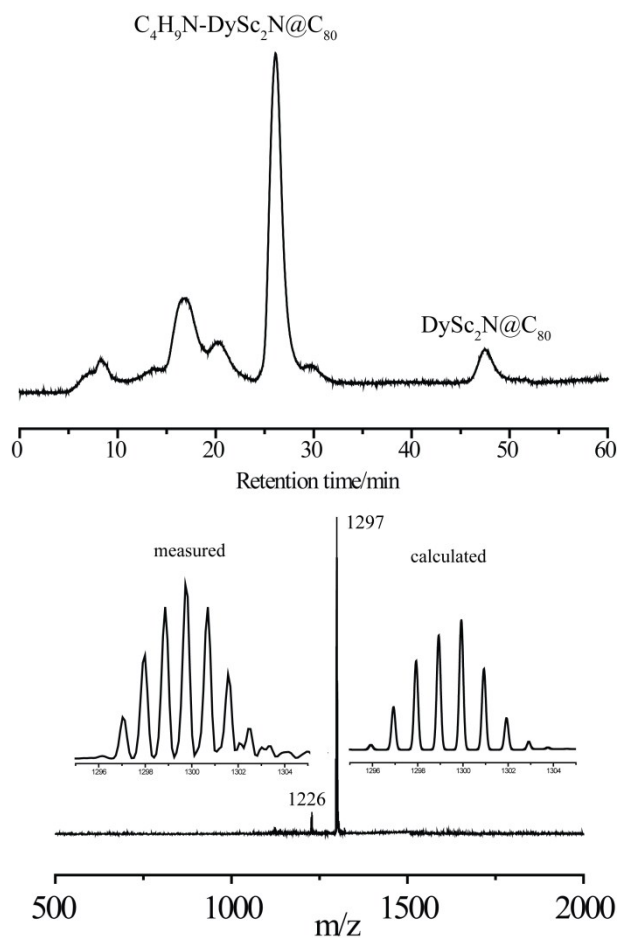

**Fig S2.** Chromatogram of the isolated  $C_4H_9N-DySc_2N@C_{80}$ . 20×250 mm Buckyprep column, flow rate 12 mL/min and toluene as eluent. The inset shows the MALDI-TOF-MS profile of  $C_4H_9N-DySc_2N@C_{80}$ .

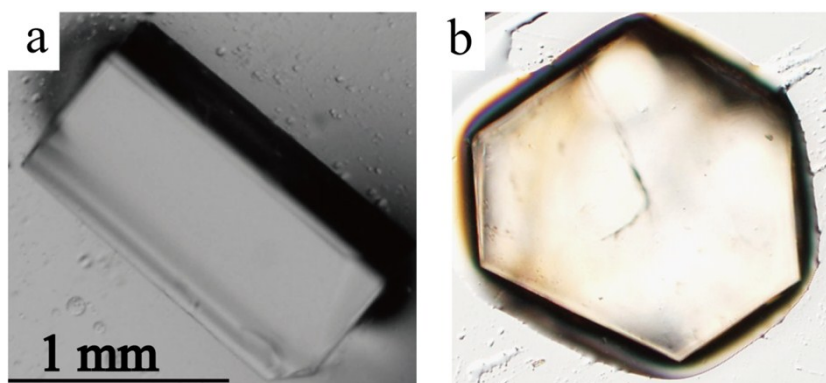

**Fig S3.** Optical image of as-prepared MOF-177 single crystal (a) and its cross-section (b).

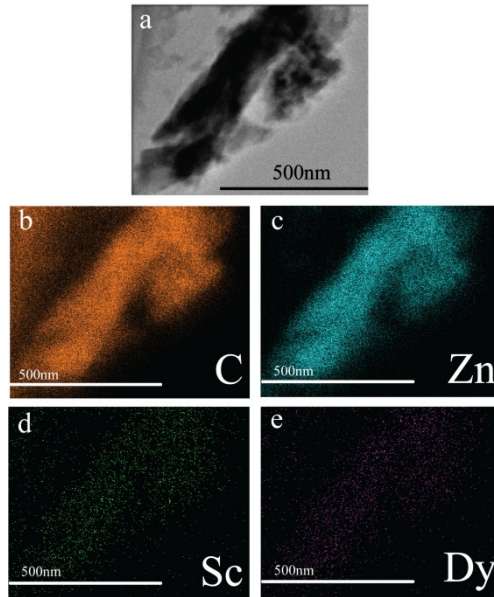

**Fig S4.** (a) TEM image of selected  $\text{DySc}_2\text{N}@C_{80}@MOF-177$  complex. TEM element mapping of C (b), Zn (c), Sc (d) and Dy (e) for  $\text{DySc}_2\text{N}@C_{80}@MOF-177$ .

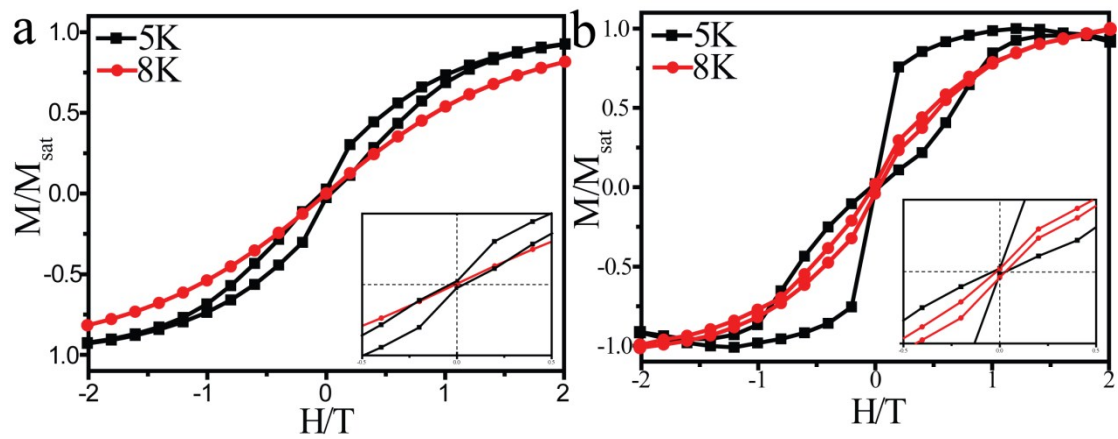

**Fig S5.** (a) Field-dependent hysteresis of the magnetization of  $\text{DySc}_2\text{N}@C_{80}$  at 5 and 8 K. (b) Field-dependent hysteresis of the magnetization of  $(C_4H_9N)\text{-DySc}_2\text{N}@C_{80}$  at 5 and 8 K.

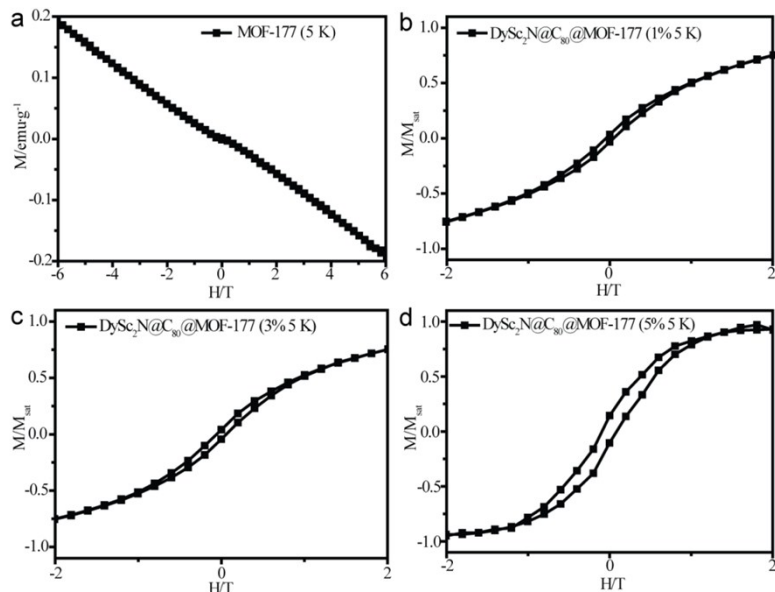

**Fig S6.** Field-dependent hysteresis of the magnetization at 5 K for DySc<sub>2</sub>N@C<sub>80</sub>@MOF-177 containing different weight content of DySc<sub>2</sub>N@C<sub>80</sub>. (a) 0%, (b) 1%, (c) 3%, (d) 5%, respectively.

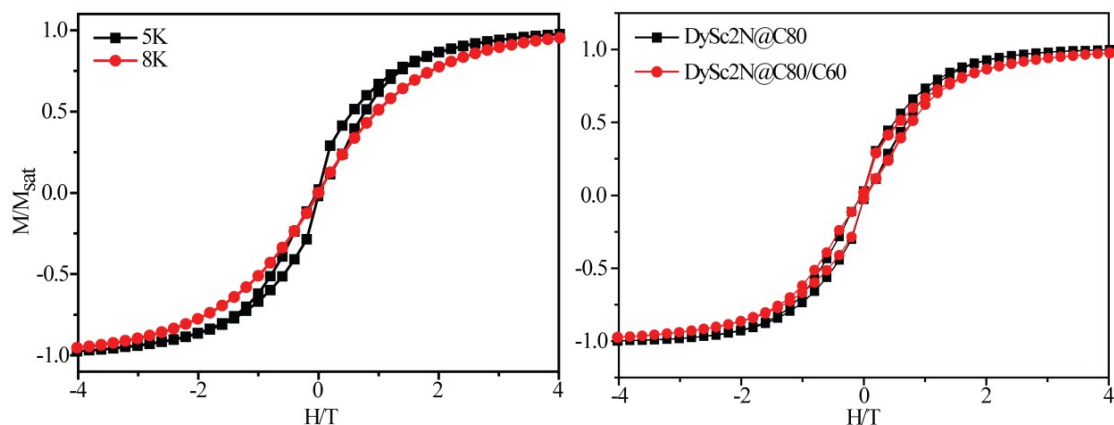

**Fig S7.** Field-dependent hysteresis of the magnetization for DySc<sub>2</sub>N@C<sub>80</sub> diluted with 50 times C<sub>60</sub>. (a) Hysteresis loops for DySc<sub>2</sub>N@C<sub>80</sub> diluted with 50 times C<sub>60</sub> at 5 and 8 K. (b) Hysteresis loops for DySc<sub>2</sub>N@C<sub>80</sub> and DySc<sub>2</sub>N@C<sub>80</sub>/C<sub>60</sub> mixture at 5 K.

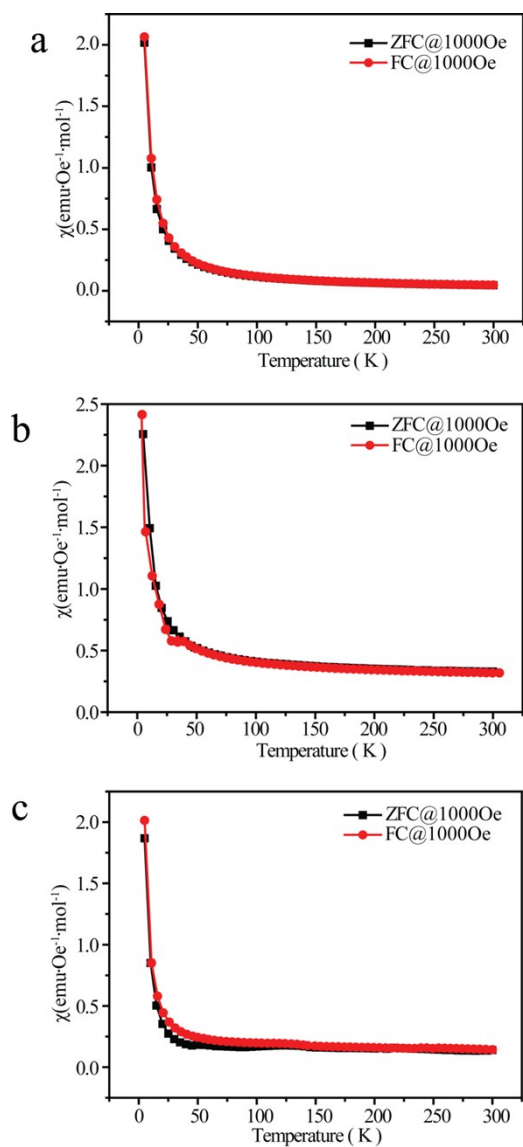

**Fig S8.** Temperature-dependent zero field cooled (ZFC) and field cooled (FC) susceptibilities at 1000 Oe. (a)  $\text{DySc}_2\text{N}@C_{80}$  (b)  $C_4H_9N\text{-DySc}_2\text{N}@C_{80}$  (c)  $\text{DySc}_2\text{N}@C_{80}@MOF\text{-}177$ .



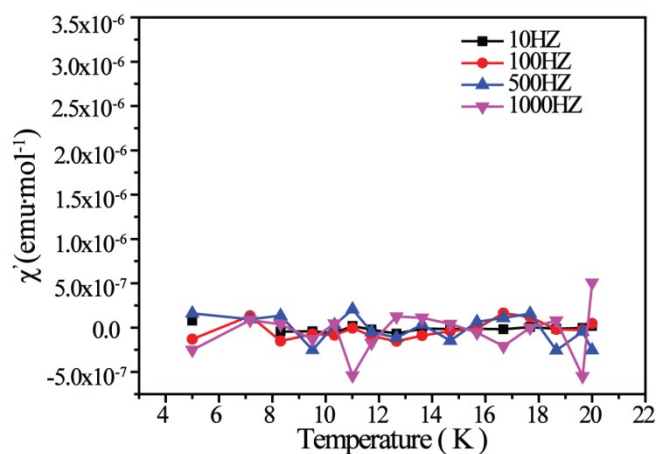

**S9:** The AC susceptibility of DySc<sub>2</sub>N@C<sub>80</sub> powder. (The result showed the signal-noise ratio was very low and the more samples might be needed for effective data)

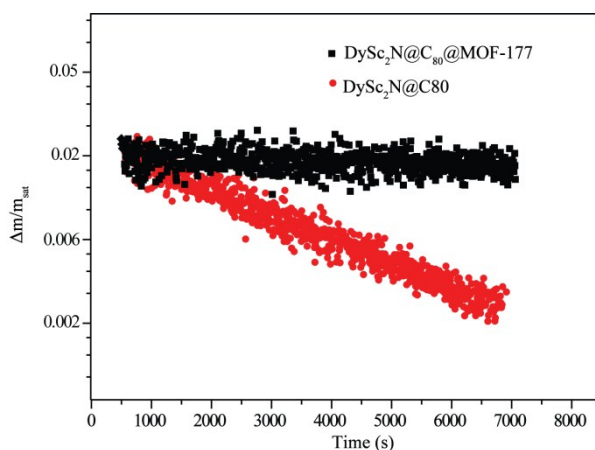

**S10:** Relaxation of the magnetization for DySc<sub>2</sub>N@C<sub>80</sub>@MOF-177 and DySc<sub>2</sub>N@C<sub>80</sub> at T = 5K, with  $\Delta m(t) = m(t) - m(t \rightarrow \infty)$ .  $m_{\text{sat}}$  is the saturation magnetization.

## 5. References

1. Chae, H. K., Siberio-Perez, D. Y., Kim, J., Go, Y., Eddaoudi, M., Matzger, A. J. O'Keeffe, M., Yaghi, O. M, *Nature* **2004**, 427, 523-527.
